# Supplementary material for: Insights into Population Health Management Through Disease Diagnoses Networks
Source: PubMed Central journal article supplement (PMC4962032; doi:10.1038/srep30465), 2016-07-27
Supplement: srep30465-s1.pdf [file srep30465-s1.pdf]

## **Insights into Population Health Management Through Disease Diagnoses Networks**

Keith Feldman<sup>1,2</sup>, Gregor Stiglic<sup>3,4</sup>, Dipanwita Dasgupta<sup>1,2</sup>, Mark Kricheff<sup>5</sup>, Zoran Obradovic<sup>6</sup>, and Nitesh V. Chawla<sup>1,2,7,\*</sup>

<sup>1</sup>University of Notre Dame, Computer Science and Engineering, Notre Dame, 46556, USA

<sup>2</sup>University of Notre Dame, Interdisciplinary Center for Network Science and Applications (iCeNSA), Notre Dame, 46556, USA

<sup>3</sup>University of Maribor, Health Sciences, Maribor, 2000, Slovenia

<sup>4</sup>University of Maribor, Electrical Engineering and Computer Science, Maribor, 2000, Slovenia

<sup>5</sup>St. Joseph's Regional Medical Center, Mishawaka, 46544, USA

<sup>6</sup>Temple University, Data Analytics and Biomedical Informatics Center, Philadelphia , 19122 , USA

<sup>7</sup>Wroclaw University of Technology, Wrocław ,50-370, Poland

\*nchawla@nd.edu

## Supplementary Information

### Data and Methods

In order to demonstrate the generalizability of the network analysis technique detailed in this work we have extended the analysis to investigate over-represented diagnoses between subgroups for a general population.

#### Data

We will again utilize the full set of 21,662,600 patient hospitalization records drawn from the Nationwide Inpatient Sample (NIS) provided by the Healthcare Cost and Utilization Project (HCUP). As in the main text the data is then partitioned into the two base populations of 9,306,956 high income and 12,355,644 low income records based on the income data provided by NIS. The low income population is determined by those patients in the lowest median income quartile, while the high income population represents those in highest median income quartile.

We then take it a step further breaking each population down into subgroups based on the individual's insurance type. For this example we will focus on the Medicaid and Private insurance plans subgroups, however the analysis could be easily adapted to other subgroups including any of the 6 possible insurance types. After partitioning we are left with 2,554,812 Medicaid, 2,809,511 Private insurance records within the low income population, and 624,003 Medicaid, 4,306,029 Private insurance records within the high income population.

#### Methods

Utilizing these populations subgroups disease networks were constructed, the process including the edge normalization function can be found in the Methods sections of the main text. Following the same methodology found in the main text for the general populations the ratios between the low and high income insurance plans were computed to identify those diagnoses which occur in greater proportion amongst each of the population subgroups

### Results

Using the visualization transformation detailed in the Methods section of the main text the resulting networks for the Medicaid and Private insurance plans can be found in Supplementary Figures 1 and 2 respectively. The visualization threshold used for each network can be at the top of figure.

As with the general population we then identified the top 10 more over-represented edges between each insurance subgroup for both the high and low income populations. These can be found in Supplementary Tables 1, 2, 3 and 4

### Discussion

As with the complete high income population group utilized in the main paper, the high income groups for both insurance groups demonstrate over-represented conditions focused primarily on pregnancy and birth related conditions. However, there is an important difference between the diagnoses in Medicaid and Private insurance subgroups. The majority of the conditions identified within the Medicaid subgroup are those which would be diagnosed at the time of birth, such as umbilical cord complications (663) or obstructed labor (660). However the conditions comprising the high income private insurance subgroup are those likely diagnosed during prenatal care visits, such as suspected fetal and placental problems affecting management of mother (656), and hypothyroidism (244). As noted in the main paper it is well established that due to the cost prenatal care visits, as well as limited access to resources lower socioeconomic populations often times fail to receive prenatal care at the appropriate times, if at all.<sup>1</sup> This differentiation further exemplifies the benefit of this network technique to isolate a diagnosis category (pregnancy) to target particular subgroups (insurance type). Continuing with an analysis of the diagnoses comprising the Medicaid and Private subgroups within the low income population group, we present additional potentially interesting deviations. Examining the Private Insurance subgroup we find the majority of conditions relate to chronic diseases such as diabetes, hypertension, heart disease, and bronchitis. Many of which have been tied to individuals with lower socioeconomic status.<sup>2-4</sup>

The low income population within Medicare subgroup however was comprised primarily of the diagnosis Human immunodeficiency (042). This is a motivating distinction. It has been well documented that individuals in lower socioeconomic conditions are at higher risk for HIV.<sup>5</sup> Prior studies have even gone so far as to shown that the correlation may be bi-directional, that HIV has a negative impact on individual's socioeconomic status.<sup>6,7</sup> While both sets of conditions are linked to low socioeconomic status the proportions of HIV-infected adults with Medicaid insurance was just over double that who carried private insurance.<sup>8</sup>

## Conclusion

The work presented in this supplementary analysis demonstrates that the populations on which the fold-change metric can be effectively applied are not limited to a single partitioning, such as income. Rather, the population subgroups can be derived from more complex multi-level partitionings. This increased specificity combined with the expansive set of health data collected around the world, can help in yielding insights into the predispositions and current health trends for increasingly targeted populations, particularly for those whose patients may be widely dispersed or few in number. The utilization of these insights is the logical next step for any physician or community health worker attempting to employ this form of informatics for targeted care and resource management, given socio-economic considerations.

## References

1. Sword, W. A socio-ecological approach to understanding barriers to prenatal care for women of low income. *Journal of Advanced Nursing* **29**, 1170–1177 (1999).
2. Robbins, J. M., Vaccarino, V., Zhang, H. & Kasl, S. V. Socioeconomic status and diagnosed diabetes incidence. *Diabetes research and clinical practice* **68**, 230–236 (2005).
3. Franks, P., Winters, P. C., Tancredi, D. J. & Fiscella, K. A. Do changes in traditional coronary heart disease risk factors over time explain the association between socio-economic status and coronary heart disease? *BMC cardiovascular disorders* **11**, 28 (2011).
4. Hawkins, N. M., Jhund, P. S., McMurray, J. J. & Capewell, S. Heart failure and socioeconomic status: accumulating evidence of inequality. *European journal of heart failure* **14**, 138–146 (2012).
5. Perry, M. J. Gender, race and economic perspectives on the social epidemiology of hiv infection: implications for prevention. *The Journal of Primary Prevention* **19**, 97–104 (1998).
6. Dray-Spira, R., Lert, F., Marimoutou, C., Bouhnik, A.-D. & Obadia, Y. Socio-economic conditions, health status and employment among persons living with hiv/aids in france in 2001. *AIDS care* **15**, 739–748 (2003).
7. Rabkin, J. G., McElhiney, M., Ferrando, S. J., Van Gorp, W. & Lin, S. H. Predictors of employment of men with hiv/aids: a longitudinal study. *Psychosomatic Medicine* **66**, 72–78 (2004).
8. Yehia, B. R. *et al.* Health insurance coverage for persons in hiv care, 2006–2012. *JAIDS Journal of Acquired Immune Deficiency Syndromes* **67**, 102–106 (2014).

| Rank | Edge Pair                                                                                                                                                          | Count |      | Normalized |         | Fold-Change |
|------|--------------------------------------------------------------------------------------------------------------------------------------------------------------------|-------|------|------------|---------|-------------|
|      |                                                                                                                                                                    | Hi    | LI   | HI         | LI      |             |
| 1    | 042 - Human immunodeficiency virus [HIV] disease<br>304 - Drug dependence                                                                                          | 87    | 1262 | 0.00115    | 0.00356 | 3.087       |
| 2    | 042 - Human immunodeficiency virus [HIV] disease<br>486 - Pneumonia, organism unspecified                                                                          | 95    | 1349 | 0.00126    | 0.0038  | 3.022       |
| 3    | 042 - Human immunodeficiency virus [HIV] disease<br>285 - Other and unspecified anemias                                                                            | 147   | 1902 | 0.00195    | 0.00536 | 2.754       |
| 4    | 042 - Human immunodeficiency virus [HIV] disease<br>112 - Candidiasis                                                                                              | 141   | 1816 | 0.00187    | 0.00512 | 2.741       |
| 5    | 042 - Human immunodeficiency virus [HIV] disease<br>401 - Essential hypertension                                                                                   | 91    | 1059 | 0.00121    | 0.00299 | 2.477       |
| 6    | 042 - Human immunodeficiency virus [HIV] disease<br>305 - Nondependent abuse of drugs                                                                              | 184   | 2035 | 0.00244    | 0.00574 | 2.354       |
| 7    | 491 - Chronic bronchitis<br>786 - Symptoms involving respiratory<br>system and other chest symptoms                                                                | 82    | 897  | 0.00109    | 0.00253 | 2.328       |
| 8    | 042 - Human immunodeficiency virus [HIV] disease<br>276 - Disorders of fluid, electrolyte,<br>and acid-base balance                                                | 224   | 2296 | 0.00297    | 0.00647 | 2.18151     |
| 9    | 626 - Disorders of menstruation and<br>other abnormal bleeding from female genital tract<br>625 - Pain and other symptoms<br>associated with female genital organs | 97    | 975  | 0.00128    | 0.00275 | 2.13928     |
| 10   | 042 - Human immunodeficiency virus [HIV] disease<br>070 - Viral hepatitis                                                                                          | 175   | 1725 | 0.00232    | 0.00486 | 2.0979      |

**Table 1.** Medicaid: Ranked list of edges where the low income (LI) population is over-represented in comparison to the high income (HI) population

| Rank | Edge Pair                                                                                                                                                      | Count |      | Normalized |         | Fold-Change |
|------|----------------------------------------------------------------------------------------------------------------------------------------------------------------|-------|------|------------|---------|-------------|
|      |                                                                                                                                                                | HI    | LI   | HI         | LI      |             |
| 1    | 343 - Infantile cerebral palsy<br>780 - General symptoms                                                                                                       | 186   | 363  | 0.00246    | 0.00102 | 2.408       |
| 2    | 652 - Malposition and malpresentation of fetus<br>664 - Trauma to perineum and vulva during delivery                                                           | 177   | 398  | 0.00234    | 0.00112 | 2.090       |
| 3    | 645 - Late pregnancy<br>663 - Umbilical cord complications                                                                                                     | 768   | 1798 | 0.01017    | 0.00507 | 2.007       |
| 4    | 665 - Other obstetrical trauma<br>664 - Trauma to perineum and vulva during delivery                                                                           | 305   | 740  | 0.00404    | 0.00209 | 1.937       |
| 5    | 507 - Pneumonitis due to solids and liquids<br>276 - Disorders of fluid, electrolyte, and acid-base balance                                                    | 383   | 930  | 0.00507    | 0.00262 | 1.935       |
| 6    | 645 - Late pregnancy<br>660 - Obstructed labor                                                                                                                 | 227   | 552  | 0.00301    | 0.00156 | 1.932       |
| 7    | 665 - Other obstetrical trauma<br>659 - Other indications for care or intervention related to labor and delivery, not elsewhere classified                     | 236   | 589  | 0.00313    | 0.00166 | 1.883       |
| 8    | 659 - Other indications for care or intervention related to labor and delivery, not elsewhere classified<br>664 - Trauma to perineum and vulva during delivery | 1296  | 3249 | 0.01717    | 0.00916 | 1.874       |
| 9    | 507 - Pneumonitis due to solids and liquids<br>250 - Diabetes mellitus                                                                                         | 161   | 406  | 0.00213    | 0.00114 | 1.863       |
| 10   | 294 - Persistent mental disorders due to conditions classified elsewhere<br>331 - Other cerebral degenerations                                                 | 184   | 465  | 0.00244    | 0.00131 | 1.859       |

**Table 2.** Medicaid: Ranked list of edges where the high income (HI) population is over-represented in comparison to the low income (LI) population

| Rank | Edge Pair                                                                                               | Count |      | Normalized |         | Fold-Change |
|------|---------------------------------------------------------------------------------------------------------|-------|------|------------|---------|-------------|
|      |                                                                                                         | HI    | LI   | HI         | LI      |             |
| 1    | 402 - Hypertensive heart disease<br>428 - Heart failure                                                 | 707   | 1094 | 0.00112    | 0.00278 | 2.477       |
| 2    | 402 - Hypertensive heart disease<br>250 - Diabetes mellitus                                             | 862   | 1267 | 0.00137    | 0.00322 | 2.352       |
| 3    | 491 - Chronic bronchitis<br>250 - Diabetes mellitus                                                     | 1234  | 1711 | 0.00196    | 0.00435 | 2.219       |
| 4    | 070 - Viral hepatitis<br>305 - Nondependent abuse of drugs                                              | 991   | 1344 | 0.00157    | 0.00342 | 2.171       |
| 5    | 716 - Other and unspecified arthropathies<br>250 - Diabetes mellitus                                    | 698   | 941  | 0.00111    | 0.00239 | 2.158       |
| 6    | 428 - Heart failure<br>715 - Osteoarthritis and allied disorders                                        | 768   | 1006 | 0.00122    | 0.00256 | 2.096       |
| 7    | 491 - Chronic bronchitis<br>401 - Essential hypertension                                                | 2593  | 3378 | 0.00412    | 0.00859 | 2.085       |
| 8    | 491 - Chronic bronchitis<br>428 - Heart failure                                                         | 1388  | 1789 | 0.00221    | 0.00455 | 2.063       |
| 9    | 428 - Heart failure<br>305 - Nondependent abuse of drugs                                                | 1957  | 2501 | 0.00311    | 0.00636 | 2.045       |
| 10   | 496 - Chronic airway obstruction, not elsewhere classified<br>715 - Osteoarthritis and allied disorders | 775   | 989  | 0.00123    | 0.00251 | 2.042       |

**Table 3.** Private Insurance: Ranked list of edges where the low income (LI) population is over-represented in comparison to the high income (HI) population

| Rank | Edge Pair                                                                                                                                                             | Count |      | Normalized |         | Fold-Change |
|------|-----------------------------------------------------------------------------------------------------------------------------------------------------------------------|-------|------|------------|---------|-------------|
|      |                                                                                                                                                                       | HI    | LI   | HI         | LI      |             |
| 1    | 244 - Acquired hypothyroidism<br>648 - Other current conditions in the mother classifiable elsewhere, but complicating pregnancy, childbirth, or the puerperium       | 3818  | 765  | 0.00607    | 0.00195 | 3.118       |
| 2    | 664 - Trauma to perineum and vulva during delivery<br>659 - Other indications for care or intervention related to labor and delivery, not elsewhere classified        | 15102 | 3175 | 0.02399    | 0.00807 | 2.972       |
| 3    | 424 - Other diseases of endocardium<br>648 - Other current conditions in the mother classifiable elsewhere, but complicating pregnancy, childbirth, or the puerperium | 2127  | 466  | 0.00338    | 0.00118 | 2.852       |
| 4    | 652 - Malposition and malpresentation of fetus<br>659 - Other indications for care or intervention related to labor and delivery, not elsewhere classified            | 4411  | 1039 | 0.00701    | 0.00264 | 2.653       |
| 5    | 663 - Umbilical cord complications<br>659 - Other indications for care or intervention related to labor and delivery, not elsewhere classified                        | 13209 | 3238 | 0.02099    | 0.00823 | 2.549       |
| 6    | 654 - Abnormality of organs and soft tissues of pelvis<br>659 - Other indications for care or intervention related to labor and delivery, not elsewhere classified    | 8579  | 2155 | 0.01363    | 0.00548 | 2.487       |
| 7    | 664 - Trauma to perineum and vulva during delivery<br>656 - Other known or suspected fetal and placental problems affecting management of mother                      | 5157  | 1296 | 0.00819    | 0.0033  | 2.486       |
| 8    | 645 - Late pregnancy<br>659 - Other indications for care or intervention related to labor and delivery, not elsewhere classified                                      | 5761  | 1450 | 0.00915    | 0.00369 | 2.482       |
| 9    | 652 - Malposition and malpresentation of fetus<br>663 - Umbilical cord complications                                                                                  | 2535  | 643  | 0.00403    | 0.00163 | 2.463       |
| 10   | 663 - Umbilical cord complications<br>664 - Trauma to perineum and vulva during delivery                                                                              | 15796 | 4066 | 0.0251     | 0.01034 | 2.427       |

**Table 4.** Private Insurance: Ranked list of edges where the high income (HI) population is over-represented in comparison to the low income (LI) population

Vt=0.4

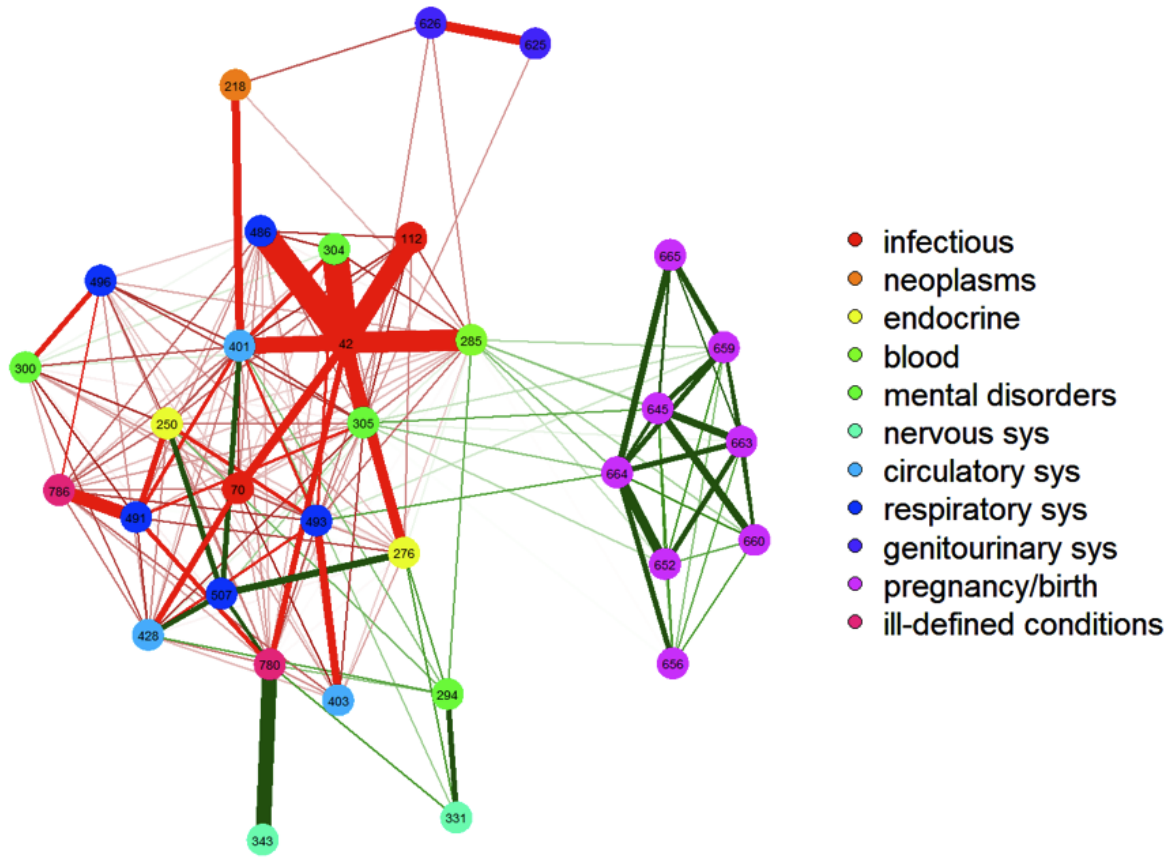

Figure 1. Network representation of over-represented Medicaid diagnoses compared to Private Insurance

| Cluster Number | ICD Code | Diagnosis Name                                                                 |
|----------------|----------|--------------------------------------------------------------------------------|
| 0              | 512      | Pneumothorax and air leak                                                      |
| 0              | 515      | Postinflammatory pulmonary fibrosis                                            |
| 0              | 518      | Other diseases of lung                                                         |
| 0              | 8        | Intestinal infections due to other organisms                                   |
| 0              | 530      | Diseases of esophagus                                                          |
| 0              | 531      | Gastric ulcer                                                                  |
| 0              | 532      | Duodenal ulcer                                                                 |
| 0              | 535      | Gastritis and duodenitis                                                       |
| 0              | 537      | Other disorders of stomach and duodenum                                        |
| 0              | 38       | Septicemia                                                                     |
| 0              | 552      | Other hernia of abdominal cavity                                               |
| 0              | 41       | Bacterial infection in conditions classified elsewhere and of unspecified site |
| 0              | 555      | Regional enteritis                                                             |
| 0              | 557      | Vascular insufficiency of intestine                                            |
| 0              | 558      | Other and unspecified noninfectious gastroenteritis and colitis                |

|   |     |                                                                   |
|---|-----|-------------------------------------------------------------------|
| 0 | 560 | Intestinal obstruction without mention of hernia                  |
| 0 | 562 | Diverticula of intestine                                          |
| 0 | 564 | Functional digestive disorders                                    |
| 0 | 53  | Herpes zoster                                                     |
| 0 | 567 | Peritonitis and retroperitoneal infections                        |
| 0 | 568 | Other disorders of peritoneum                                     |
| 0 | 569 | Other disorders of intestine                                      |
| 0 | 570 | Acute and subacute necrosis of liver                              |
| 0 | 571 | Chronic liver disease and cirrhosis                               |
| 0 | 574 | Cholelithiasis                                                    |
| 0 | 576 | Other disorders of biliary tract                                  |
| 0 | 577 | Diseases of pancreas                                              |
| 0 | 578 | Gastrointestinal hemorrhage                                       |
| 0 | 583 | Nephritis and nephropathy                                         |
| 0 | 584 | Acute kidney failure                                              |
| 0 | 585 | Chronic kidney disease (CKD)                                      |
| 0 | 590 | Infections of kidney                                              |
| 0 | 591 | Hydronephrosis                                                    |
| 0 | 592 | Calculus of kidney and ureter                                     |
| 0 | 593 | Other disorders of kidney and ureter                              |
| 0 | 596 | Other disorders of bladder                                        |
| 0 | 599 | Other disorders of urethra and urinary tract                      |
| 0 | 600 | Hyperplasia of prostate                                           |
| 0 | 357 | Inflammatory and toxic neuropathy                                 |
| 0 | 924 | Contusion of lower limb and of other and unspecified sites        |
| 0 | 784 | Symptoms involving head and neck                                  |
| 0 | 618 | Genital prolapse                                                  |
| 0 | 786 | Symptoms involving respiratory system and other chest symptoms    |
| 0 | 112 | Candidiasis                                                       |
| 0 | 625 | Pain and other symptoms associated with female genital organs     |
| 0 | 275 | Disorders of mineral metabolism                                   |
| 0 | 276 | Disorders of fluid                                                |
| 0 | 278 | Overweight                                                        |
| 0 | 710 | Diffuse diseases of connective tissue                             |
| 0 | 682 | Other cellulitis and abscess                                      |
| 0 | 174 | Malignant neoplasm of female breast                               |
| 0 | 696 | Psoriasis and similar disorders                                   |
| 0 | 185 | Malignant neoplasm of prostate                                    |
| 0 | 799 | Other ill-defined and unknown causes of morbidity and mortality   |
| 0 | 714 | Rheumatoid arthritis and other inflammatory polyarthropathies     |
| 0 | 707 | Chronic ulcer of skin                                             |
| 0 | 196 | Secondary and unspecified malignant neoplasm of lymph nodes       |
| 0 | 197 | Secondary malignant neoplasm of respiratory and digestive systems |
| 0 | 198 | Secondary malignant neoplasm of other specified sites             |
| 0 | 199 | Malignant neoplasm without specification of site                  |
| 0 | 202 | Other malignant neoplasms of lymphoid and histiocytic tissue      |
| 0 | 715 | Osteoarthritis and allied disorders                               |
| 0 | 719 | Other and unspecified disorders of joint                          |
| 0 | 721 | Spondylosis and allied disorders                                  |
| 0 | 722 | Intervertebral disc disorders                                     |
| 0 | 211 | Benign neoplasm of other parts of digestive system                |
| 0 | 724 | Other and unspecified disorders of back                           |



|   |     |                                                                             |
|---|-----|-----------------------------------------------------------------------------|
| 0 | 726 | Peripheral enthesopathies and allied syndromes                              |
| 0 | 727 | Other disorders of synovium                                                 |
| 0 | 728 | Disorders of muscle                                                         |
| 0 | 729 | Other disorders of soft tissues                                             |
| 0 | 733 | Other disorders of bone and cartilage                                       |
| 0 | 805 | Fracture of vertebral column without mention of spinal cord injury          |
| 0 | 737 | Curvature of spine                                                          |
| 0 | 860 | Traumatic pneumothorax and hemothorax                                       |
| 0 | 238 | Neoplasm of uncertain behavior of other and unspecified sites and tissues   |
| 0 | 242 | Thyrotoxicosis with or without goiter                                       |
| 0 | 244 | Acquired hypothyroidism                                                     |
| 0 | 553 | Other hernia of abdominal cavity without mention of obstruction or gangrene |
| 0 | 250 | Diabetes mellitus                                                           |
| 0 | 253 | Disorders of the pituitary gland and its hypothalamic control               |
| 0 | 255 | Disorders of adrenal glands                                                 |
| 0 | 263 | Other and unspecified protein-calorie malnutrition                          |
| 0 | 812 | Fracture of humerus                                                         |
| 0 | 780 | General symptoms                                                            |
| 0 | 781 | Symptoms involving nervous and musculoskeletal systems                      |
| 0 | 782 | Symptoms involving skin and other integumentary tissue                      |
| 0 | 783 | Symptoms concerning nutrition                                               |
| 0 | 272 | Disorders of lipid metabolism                                               |
| 0 | 785 | Symptoms involving cardiovascular system                                    |
| 0 | 274 | Gout                                                                        |
| 0 | 787 | Symptoms involving digestive system                                         |
| 0 | 788 | Symptoms involving urinary system                                           |
| 0 | 789 | Other symptoms involving abdomen and pelvis                                 |
| 0 | 790 | Nonspecific findings on examination of blood                                |
| 0 | 280 | Iron deficiency anemias                                                     |
| 0 | 794 | Nonspecific abnormal results of function studies                            |
| 0 | 284 | Aplastic anemia and other bone marrow failure syndromes                     |
| 0 | 285 | Other and unspecified anemias                                               |
| 0 | 286 | Coagulation defects                                                         |
| 0 | 287 | Purpura and other hemorrhagic conditions                                    |
| 0 | 288 | Diseases of white blood cells                                               |
| 0 | 289 | Other diseases of blood and blood-forming organs                            |
| 0 | 290 | Dementias                                                                   |
| 0 | 291 | Alcohol-induced mental disorders                                            |
| 0 | 292 | Drug-induced mental disorders                                               |
| 0 | 293 | Transient mental disorders due to conditions classified elsewhere           |
| 0 | 294 | Persistent mental disorders due to conditions classified elsewhere          |
| 0 | 807 | Fracture of ribs)                                                           |
| 0 | 296 | Episodic mood disorders                                                     |
| 0 | 300 | Anxiety                                                                     |
| 0 | 303 | Alcohol dependence syndrome                                                 |
| 0 | 820 | Fracture of neck of femur                                                   |
| 0 | 311 | Depressive disorder                                                         |
| 0 | 824 | Fracture of ankle                                                           |
| 0 | 327 | Organic sleep disorders                                                     |
| 0 | 331 | Other cerebral degenerations                                                |
| 0 | 332 | "Parkinsons disease                                                         |
| 0 | 333 | Other extrapyramidal disease and abnormal movement disorders                |

|   |     |                                                                |
|---|-----|----------------------------------------------------------------|
| 0 | 338 | Pain                                                           |
| 0 | 340 | Multiple sclerosis                                             |
| 0 | 342 | Hemiplegia and hemiparesis                                     |
| 0 | 346 | Migraine                                                       |
| 0 | 348 | Other conditions of brain                                      |
| 0 | 355 | Mononeuritis of lower limb                                     |
| 0 | 356 | Hereditary and idiopathic peripheral neuropathy                |
| 0 | 486 | Pneumonia                                                      |
| 0 | 873 | Other open wound of head                                       |
| 0 | 362 | Other retinal disorders                                        |
| 0 | 365 | Glaucoma                                                       |
| 0 | 368 | Visual disturbances                                            |
| 0 | 386 | Vertiginous syndromes and other disorders of vestibular system |
| 0 | 389 | Hearing loss                                                   |
| 0 | 396 | Diseases of mitral and aortic valves                           |
| 0 | 397 | Diseases of other endocardial structures                       |
| 0 | 398 | Other rheumatic heart disease                                  |
| 0 | 401 | Essential hypertension                                         |
| 0 | 403 | Hypertensive chronic kidney disease                            |
| 0 | 153 | Malignant neoplasm of colon                                    |
| 0 | 920 | Contusion of face                                              |
| 0 | 410 | Acute myocardial infarction                                    |
| 0 | 411 | Other acute and subacute forms of ischemic heart disease       |
| 0 | 412 | Old myocardial infarction                                      |
| 0 | 413 | Angina pectoris                                                |
| 0 | 414 | Other forms of chronic ischemic heart disease                  |
| 0 | 415 | Acute pulmonary heart disease                                  |
| 0 | 416 | Chronic pulmonary heart disease                                |
| 0 | 423 | Other diseases of pericardium                                  |
| 0 | 424 | Other diseases of endocardium                                  |
| 0 | 425 | Cardiomyopathy                                                 |
| 0 | 426 | Conduction disorders                                           |
| 0 | 427 | Cardiac dysrhythmias                                           |
| 0 | 428 | Heart failure                                                  |
| 0 | 429 | Ill-defined descriptions and complications of heart disease    |
| 0 | 431 | Intracerebral hemorrhage                                       |
| 0 | 433 | Occlusion and stenosis of precerebral arteries                 |
| 0 | 434 | Occlusion of cerebral arteries                                 |
| 0 | 435 | Transient cerebral ischemia                                    |
| 0 | 437 | Other and ill-defined cerebrovascular disease                  |
| 0 | 438 | Late effects of cerebrovascular disease                        |
| 0 | 440 | Atherosclerosis                                                |
| 0 | 441 | Aortic aneurysm and dissection                                 |
| 0 | 443 | Other peripheral vascular disease                              |
| 0 | 453 | Other venous embolism and thrombosis                           |
| 0 | 455 | Hemorrhoids                                                    |
| 0 | 969 | Poisoning by psychotropic agents                               |
| 0 | 458 | Hypotension                                                    |
| 0 | 459 | Other disorders of circulatory system                          |
| 0 | 162 | Malignant neoplasm of trachea                                  |
| 0 | 473 | Chronic sinusitis                                              |
| 0 | 477 | Allergic rhinitis                                              |

|   |     |                                                                                      |
|---|-----|--------------------------------------------------------------------------------------|
| 0 | 478 | Other diseases of upper respiratory tract                                            |
| 0 | 482 | Other bacterial pneumonia                                                            |
| 0 | 995 | Certain adverse effects not elsewhere classified                                     |
| 0 | 996 | Complications peculiar to certain specified procedures                               |
| 0 | 997 | Complications affecting specified body systems                                       |
| 0 | 998 | Other complications of procedures                                                    |
| 0 | 492 | Emphysema                                                                            |
| 0 | 493 | Asthma                                                                               |
| 0 | 496 | Chronic airway obstruction                                                           |
| 0 | 507 | Pneumonitis due to solids and liquids                                                |
| 0 | 511 | Pleurisy                                                                             |
| 1 | 54  | Herpes simplex                                                                       |
| 1 | 647 | Infectious and parasitic conditions in the mother classifiable elsewhere             |
| 2 | 614 | Inflammatory disease of ovary                                                        |
| 2 | 616 | Inflammatory disease of cervix                                                       |
| 2 | 617 | Endometriosis                                                                        |
| 2 | 620 | Noninflammatory disorders of ovary                                                   |
| 2 | 626 | Disorders of menstruation and other abnormal bleeding from female genital tract      |
| 2 | 218 | Uterine leiomyoma                                                                    |
| 3 | 641 | Antepartum hemorrhage                                                                |
| 3 | 642 | Hypertension complicating pregnancy                                                  |
| 3 | 644 | Early or threatened labor                                                            |
| 3 | 645 | Late pregnancy                                                                       |
| 3 | 646 | Other complications of pregnancy                                                     |
| 3 | 648 | Other current conditions in the mother classifiable elsewhere                        |
| 3 | 652 | Malposition and malpresentation of fetus                                             |
| 3 | 654 | Abnormality of organs and soft tissues of pelvis                                     |
| 3 | 656 | Other known or suspected fetal and placental problems affecting management of mother |
| 3 | 658 | Other problems associated with amniotic cavity and membranes                         |
| 3 | 659 | Other indications for care or intervention related to labor and delivery             |
| 3 | 660 | Obstructed labor                                                                     |
| 3 | 661 | Abnormality of forces of labor                                                       |
| 3 | 663 | Umbilical cord complications                                                         |
| 3 | 664 | Trauma to perineum and vulva during delivery                                         |
| 3 | 665 | Other obstetrical trauma                                                             |
| 3 | 666 | Postpartum hemorrhage                                                                |
| 3 | 669 | Other complications of labor and delivery                                            |

**Table 5.** High Income Community Detection - Label Propagation

| Cluster Number | ICD Code | Diagnosis Name                               |
|----------------|----------|----------------------------------------------|
| 0              | 515      | Postinflammatory pulmonary fibrosis          |
| 0              | 518      | Other diseases of lung                       |
| 0              | 519      | Other diseases of respiratory system         |
| 0              | 8        | Intestinal infections due to other organisms |
| 0              | 530      | Diseases of esophagus                        |
| 0              | 531      | Gastric ulcer                                |
| 0              | 532      | Duodenal ulcer                               |
| 0              | 533      | Peptic ulcer                                 |
| 0              | 535      | Gastritis and duodenitis                     |
| 0              | 536      | Disorders of function of stomach             |

|   |     |                                                                                 |
|---|-----|---------------------------------------------------------------------------------|
| 0 | 38  | Septicemia                                                                      |
| 0 | 41  | Bacterial infection in conditions classified elsewhere and of unspecified site  |
| 0 | 558 | Other and unspecified noninfectious gastroenteritis and colitis                 |
| 0 | 560 | Intestinal obstruction without mention of hernia                                |
| 0 | 562 | Diverticula of intestine                                                        |
| 0 | 564 | Functional digestive disorders                                                  |
| 0 | 569 | Other disorders of intestine                                                    |
| 0 | 571 | Chronic liver disease and cirrhosis                                             |
| 0 | 572 | Liver abscess and sequelae of chronic liver disease                             |
| 0 | 573 | Other disorders of liver                                                        |
| 0 | 574 | Cholelithiasis                                                                  |
| 0 | 575 | Other disorders of gallbladder                                                  |
| 0 | 577 | Diseases of pancreas                                                            |
| 0 | 578 | Gastrointestinal hemorrhage                                                     |
| 0 | 70  | Viral hepatitis                                                                 |
| 0 | 583 | Nephritis and nephropathy                                                       |
| 0 | 584 | Acute kidney failure                                                            |
| 0 | 585 | Chronic kidney disease (CKD)                                                    |
| 0 | 588 | Disorders resulting from impaired renal function                                |
| 0 | 590 | Infections of kidney                                                            |
| 0 | 592 | Calculus of kidney and ureter                                                   |
| 0 | 593 | Other disorders of kidney and ureter                                            |
| 0 | 596 | Other disorders of bladder                                                      |
| 0 | 599 | Other disorders of urethra and urinary tract                                    |
| 0 | 600 | Hyperplasia of prostate                                                         |
| 0 | 784 | Symptoms involving head and neck                                                |
| 0 | 614 | Inflammatory disease of ovary                                                   |
| 0 | 273 | Disorders of plasma protein metabolism                                          |
| 0 | 620 | Noninflammatory disorders of ovary                                              |
| 0 | 274 | Gout                                                                            |
| 0 | 110 | Dermatophytosis                                                                 |
| 0 | 112 | Candidiasis                                                                     |
| 0 | 625 | Pain and other symptoms associated with female genital organs                   |
| 0 | 626 | Disorders of menstruation and other abnormal bleeding from female genital tract |
| 0 | 787 | Symptoms involving digestive system                                             |
| 0 | 788 | Symptoms involving urinary system                                               |
| 0 | 642 | Hypertension complicating pregnancy                                             |
| 0 | 790 | Nonspecific findings on examination of blood                                    |
| 0 | 646 | Other complications of pregnancy                                                |
| 0 | 647 | Infectious and parasitic conditions in the mother classifiable elsewhere        |
| 0 | 648 | Other current conditions in the mother classifiable elsewhere                   |
| 0 | 649 | Other conditions or status of the mother complicating pregnancy                 |
| 0 | 654 | Abnormality of organs and soft tissues of pelvis                                |
| 0 | 659 | Other indications for care or intervention related to labor and delivery        |
| 0 | 281 | Other deficiency anemias                                                        |
| 0 | 153 | Malignant neoplasm of colon                                                     |
| 0 | 162 | Malignant neoplasm of trachea                                                   |
| 0 | 710 | Diffuse diseases of connective tissue                                           |
| 0 | 681 | Cellulitis and abscess of finger and toe                                        |
| 0 | 682 | Other cellulitis and abscess                                                    |
| 0 | 287 | Purpura and other hemorrhagic conditions                                        |
| 0 | 707 | Chronic ulcer of skin                                                           |

|   |     |                                                                                          |
|---|-----|------------------------------------------------------------------------------------------|
| 0 | 197 | Secondary malignant neoplasm of respiratory and digestive systems                        |
| 0 | 198 | Secondary malignant neoplasm of other specified sites                                    |
| 0 | 199 | Malignant neoplasm without specification of site                                         |
| 0 | 714 | Rheumatoid arthritis and other inflammatory polyarthropathies                            |
| 0 | 715 | Osteoarthritis and allied disorders                                                      |
| 0 | 716 | Other and unspecified arthropathies                                                      |
| 0 | 719 | Other and unspecified disorders of joint                                                 |
| 0 | 721 | Spondylosis and allied disorders                                                         |
| 0 | 722 | Intervertebral disc disorders                                                            |
| 0 | 211 | Benign neoplasm of other parts of digestive system                                       |
| 0 | 724 | Other and unspecified disorders of back                                                  |
| 0 | 728 | Disorders of muscle                                                                      |
| 0 | 729 | Other disorders of soft tissues                                                          |
| 0 | 730 | Osteomyelitis                                                                            |
| 0 | 731 | Osteitis deformans and osteopathies associated with other disorders classified elsewhere |
| 0 | 733 | Other disorders of bone and cartilage                                                    |
| 0 | 242 | Thyrotoxicosis with or without goiter                                                    |
| 0 | 723 | Other disorders of cervical region                                                       |
| 0 | 244 | Acquired hypothyroidism                                                                  |
| 0 | 553 | Other hernia of abdominal cavity without mention of obstruction or gangrene              |
| 0 | 250 | Diabetes mellitus                                                                        |
| 0 | 251 | Other disorders of pancreatic internal secretion                                         |
| 0 | 263 | Other and unspecified protein-calorie malnutrition                                       |
| 0 | 266 | Deficiency of B-complex components                                                       |
| 0 | 780 | General symptoms                                                                         |
| 0 | 781 | Symptoms involving nervous and musculoskeletal systems                                   |
| 0 | 782 | Symptoms involving skin and other integumentary tissue                                   |
| 0 | 783 | Symptoms concerning nutrition                                                            |
| 0 | 272 | Disorders of lipid metabolism                                                            |
| 0 | 785 | Symptoms involving cardiovascular system                                                 |
| 0 | 786 | Symptoms involving respiratory system and other chest symptoms                           |
| 0 | 275 | Disorders of mineral metabolism                                                          |
| 0 | 276 | Disorders of fluid                                                                       |
| 0 | 789 | Other symptoms involving abdomen and pelvis                                              |
| 0 | 278 | Overweight                                                                               |
| 0 | 280 | Iron deficiency anemias                                                                  |
| 0 | 998 | Other complications of procedures                                                        |
| 0 | 794 | Nonspecific abnormal results of function studies                                         |
| 0 | 284 | Aplastic anemia and other bone marrow failure syndromes                                  |
| 0 | 285 | Other and unspecified anemias                                                            |
| 0 | 286 | Coagulation defects                                                                      |
| 0 | 799 | Other ill-defined and unknown causes of morbidity and mortality                          |
| 0 | 288 | Diseases of white blood cells                                                            |
| 0 | 290 | Dementias                                                                                |
| 0 | 291 | Alcohol-induced mental disorders                                                         |
| 0 | 292 | Drug-induced mental disorders                                                            |
| 0 | 293 | Transient mental disorders due to conditions classified elsewhere                        |
| 0 | 294 | Persistent mental disorders due to conditions classified elsewhere                       |
| 0 | 295 | Schizophrenic disorders                                                                  |
| 0 | 296 | Episodic mood disorders                                                                  |
| 0 | 298 | Other nonorganic psychoses                                                               |
| 0 | 300 | Anxiety                                                                                  |

|   |     |                                                              |
|---|-----|--------------------------------------------------------------|
| 0 | 301 | Personality disorders                                        |
| 0 | 303 | Alcohol dependence syndrome                                  |
| 0 | 304 | Drug dependence                                              |
| 0 | 305 | Nondependent abuse of drugs                                  |
| 0 | 820 | Fracture of neck of femur                                    |
| 0 | 309 | Adjustment reaction                                          |
| 0 | 311 | Depressive disorder                                          |
| 0 | 327 | Organic sleep disorders                                      |
| 0 | 331 | Other cerebral degenerations                                 |
| 0 | 332 | "Parkinsons disease                                          |
| 0 | 333 | Other extrapyramidal disease and abnormal movement disorders |
| 0 | 337 | Disorders of the autonomic nervous system                    |
| 0 | 338 | Pain                                                         |
| 0 | 342 | Hemiplegia and hemiparesis                                   |
| 0 | 344 | Other paralytic syndromes                                    |
| 0 | 345 | Epilepsy and recurrent seizures                              |
| 0 | 346 | Migraine                                                     |
| 0 | 348 | Other conditions of brain                                    |
| 0 | 355 | Mononeuritis of lower limb                                   |
| 0 | 356 | Hereditary and idiopathic peripheral neuropathy              |
| 0 | 357 | Inflammatory and toxic neuropathy                            |
| 0 | 362 | Other retinal disorders                                      |
| 0 | 365 | Glaucoma                                                     |
| 0 | 369 | Blindness and low vision                                     |
| 0 | 389 | Hearing loss                                                 |
| 0 | 397 | Diseases of other endocardial structures                     |
| 0 | 401 | Essential hypertension                                       |
| 0 | 402 | Hypertensive heart disease                                   |
| 0 | 403 | Hypertensive chronic kidney disease                          |
| 0 | 404 | Hypertensive heart and chronic kidney disease                |
| 0 | 218 | Uterine leiomyoma                                            |
| 0 | 410 | Acute myocardial infarction                                  |
| 0 | 411 | Other acute and subacute forms of ischemic heart disease     |
| 0 | 412 | Old myocardial infarction                                    |
| 0 | 413 | Angina pectoris                                              |
| 0 | 414 | Other forms of chronic ischemic heart disease                |
| 0 | 415 | Acute pulmonary heart disease                                |
| 0 | 416 | Chronic pulmonary heart disease                              |
| 0 | 424 | Other diseases of endocardium                                |
| 0 | 425 | Cardiomyopathy                                               |
| 0 | 426 | Conduction disorders                                         |
| 0 | 427 | Cardiac dysrhythmias                                         |
| 0 | 428 | Heart failure                                                |
| 0 | 429 | Ill-defined descriptions and complications of heart disease  |
| 0 | 433 | Occlusion and stenosis of precerebral arteries               |
| 0 | 434 | Occlusion of cerebral arteries                               |
| 0 | 435 | Transient cerebral ischemia                                  |
| 0 | 437 | Other and ill-defined cerebrovascular disease                |
| 0 | 438 | Late effects of cerebrovascular disease                      |
| 0 | 440 | Atherosclerosis                                              |
| 0 | 441 | Aortic aneurysm and dissection                               |
| 0 | 443 | Other peripheral vascular disease                            |

|   |     |                                                                     |
|---|-----|---------------------------------------------------------------------|
| 0 | 444 | Arterial embolism and thrombosis                                    |
| 0 | 447 | Other disorders of arteries and arterioles                          |
| 0 | 453 | Other venous embolism and thrombosis                                |
| 0 | 455 | Hemorrhoids                                                         |
| 0 | 456 | Varicose veins of other sites                                       |
| 0 | 969 | Poisoning by psychotropic agents                                    |
| 0 | 458 | Hypotension                                                         |
| 0 | 459 | Other disorders of circulatory system                               |
| 0 | 465 | Acute upper respiratory infections of multiple or unspecified sites |
| 0 | 466 | Acute bronchitis and bronchiolitis                                  |
| 0 | 473 | Chronic sinusitis                                                   |
| 0 | 477 | Allergic rhinitis                                                   |
| 0 | 482 | Other bacterial pneumonia                                           |
| 0 | 995 | Certain adverse effects not elsewhere classified                    |
| 0 | 996 | Complications peculiar to certain specified procedures              |
| 0 | 997 | Complications affecting specified body systems                      |
| 0 | 486 | Pneumonia                                                           |
| 0 | 490 | Bronchitis                                                          |
| 0 | 491 | Chronic bronchitis                                                  |
| 0 | 492 | Emphysema                                                           |
| 0 | 493 | Asthma                                                              |
| 0 | 496 | Chronic airway obstruction                                          |
| 0 | 507 | Pneumonitis due to solids and liquids                               |
| 0 | 511 | Pleurisy                                                            |

**Table 6.** Low Income Community Detection - Label Propagation

| <b>Cluster Number</b> | <b>ICD Code</b> | <b>Diagnosis Name</b>                                                          |
|-----------------------|-----------------|--------------------------------------------------------------------------------|
| 0                     | 512             | Pneumothorax and air leak                                                      |
| 0                     | 532             | Duodenal ulcer                                                                 |
| 0                     | 537             | Other disorders of stomach and duodenum                                        |
| 0                     | 557             | Vascular insufficiency of intestine                                            |
| 0                     | 568             | Other disorders of peritoneum                                                  |
| 0                     | 576             | Other disorders of biliary tract                                               |
| 0                     | 592             | Calculus of kidney and ureter                                                  |
| 0                     | 174             | Malignant neoplasm of female breast                                            |
| 0                     | 202             | Other malignant neoplasms of lymphoid and histiocytic tissue                   |
| 0                     | 253             | Disorders of the pituitary gland and its hypothalamic control                  |
| 0                     | 255             | Disorders of adrenal glands                                                    |
| 0                     | 289             | Other diseases of blood and blood-forming organs                               |
| 0                     | 293             | Transient mental disorders due to conditions classified elsewhere              |
| 0                     | 873             | Other open wound of head                                                       |
| 0                     | 401             | Essential hypertension                                                         |
| 1                     | 515             | Postinflammatory pulmonary fibrosis                                            |
| 1                     | 518             | Other diseases of lung                                                         |
| 1                     | 8               | Intestinal infections due to other organisms                                   |
| 1                     | 530             | Diseases of esophagus                                                          |
| 1                     | 38              | Septicemia                                                                     |
| 1                     | 41              | Bacterial infection in conditions classified elsewhere and of unspecified site |
| 1                     | 560             | Intestinal obstruction without mention of hernia                               |
| 1                     | 562             | Diverticula of intestine                                                       |

|   |     |                                                                             |
|---|-----|-----------------------------------------------------------------------------|
| 1 | 564 | Functional digestive disorders                                              |
| 1 | 569 | Other disorders of intestine                                                |
| 1 | 571 | Chronic liver disease and cirrhosis                                         |
| 1 | 574 | Cholelithiasis                                                              |
| 1 | 577 | Diseases of pancreas                                                        |
| 1 | 578 | Gastrointestinal hemorrhage                                                 |
| 1 | 584 | Acute kidney failure                                                        |
| 1 | 585 | Chronic kidney disease CKD                                                  |
| 1 | 591 | Hydronephrosis                                                              |
| 1 | 593 | Other disorders of kidney and ureter                                        |
| 1 | 596 | Other disorders of bladder                                                  |
| 1 | 599 | Other disorders of urethra and urinary tract                                |
| 1 | 600 | Hyperplasia of prostate                                                     |
| 1 | 357 | Inflammatory and toxic neuropathy                                           |
| 1 | 784 | Symptoms involving head and neck                                            |
| 1 | 786 | Symptoms involving respiratory system and other chest symptoms              |
| 1 | 112 | Candidiasis                                                                 |
| 1 | 275 | Disorders of mineral metabolism                                             |
| 1 | 276 | Disorders of fluid                                                          |
| 1 | 278 | Overweight                                                                  |
| 1 | 682 | Other cellulitis and abscess                                                |
| 1 | 185 | Malignant neoplasm of prostate                                              |
| 1 | 799 | Other ill-defined and unknown causes of morbidity and mortality             |
| 1 | 714 | Rheumatoid arthritis and other inflammatory polyarthropathies               |
| 1 | 707 | Chronic ulcer of skin                                                       |
| 1 | 196 | Secondary and unspecified malignant neoplasm of lymph nodes                 |
| 1 | 197 | Secondary malignant neoplasm of respiratory and digestive systems           |
| 1 | 198 | Secondary malignant neoplasm of other specified sites                       |
| 1 | 715 | Osteoarthritis and allied disorders                                         |
| 1 | 719 | Other and unspecified disorders of joint                                    |
| 1 | 721 | Spondylosis and allied disorders                                            |
| 1 | 722 | Intervertebral disc disorders                                               |
| 1 | 211 | Benign neoplasm of other parts of digestive system                          |
| 1 | 724 | Other and unspecified disorders of back                                     |
| 1 | 728 | Disorders of muscle                                                         |
| 1 | 729 | Other disorders of soft tissues                                             |
| 1 | 733 | Other disorders of bone and cartilage                                       |
| 1 | 238 | Neoplasm of uncertain behavior of other and unspecified sites and tissues   |
| 1 | 244 | Acquired hypothyroidism                                                     |
| 1 | 553 | Other hernia of abdominal cavity without mention of obstruction or gangrene |
| 1 | 250 | Diabetes mellitus                                                           |
| 1 | 263 | Other and unspecified protein-calorie malnutrition                          |
| 1 | 780 | General symptoms                                                            |
| 1 | 781 | Symptoms involving nervous and musculoskeletal systems                      |
| 1 | 782 | Symptoms involving skin and other integumentary tissue                      |
| 1 | 783 | Symptoms concerning nutrition                                               |
| 1 | 272 | Disorders of lipid metabolism                                               |
| 1 | 785 | Symptoms involving cardiovascular system                                    |
| 1 | 274 | Gout                                                                        |
| 1 | 787 | Symptoms involving digestive system                                         |
| 1 | 788 | Symptoms involving urinary system                                           |
| 1 | 789 | Other symptoms involving abdomen and pelvis                                 |



|   |     |                                                                    |
|---|-----|--------------------------------------------------------------------|
| 1 | 790 | Nonspecific findings on examination of blood                       |
| 1 | 280 | Iron deficiency anemias                                            |
| 1 | 794 | Nonspecific abnormal results of function studies                   |
| 1 | 284 | Aplastic anemia and other bone marrow failure syndromes            |
| 1 | 285 | Other and unspecified anemias                                      |
| 1 | 286 | Coagulation defects                                                |
| 1 | 287 | Purpura and other hemorrhagic conditions                           |
| 1 | 288 | Diseases of white blood cells                                      |
| 1 | 290 | Dementias                                                          |
| 1 | 292 | Drug-induced mental disorders                                      |
| 1 | 294 | Persistent mental disorders due to conditions classified elsewhere |
| 1 | 300 | Anxiety                                                            |
| 1 | 820 | Fracture of neck of femur                                          |
| 1 | 311 | Depressive disorder                                                |
| 1 | 327 | Organic sleep disorders                                            |
| 1 | 331 | Other cerebral degenerations                                       |
| 1 | 332 | "Parkinsons disease                                                |
| 1 | 333 | Other extrapyramidal disease and abnormal movement disorders       |
| 1 | 338 | Pain                                                               |
| 1 | 346 | Migraine                                                           |
| 1 | 348 | Other conditions of brain                                          |
| 1 | 356 | Hereditary and idiopathic peripheral neuropathy                    |
| 1 | 486 | Pneumonia                                                          |
| 1 | 362 | Other retinal disorders                                            |
| 1 | 365 | Glaucoma                                                           |
| 1 | 389 | Hearing loss                                                       |
| 1 | 396 | Diseases of mitral and aortic valves                               |
| 1 | 397 | Diseases of other endocardial structures                           |
| 1 | 398 | Other rheumatic heart disease                                      |
| 1 | 403 | Hypertensive chronic kidney disease                                |
| 1 | 153 | Malignant neoplasm of colon                                        |
| 1 | 410 | Acute myocardial infarction                                        |
| 1 | 411 | Other acute and subacute forms of ischemic heart disease           |
| 1 | 412 | Old myocardial infarction                                          |
| 1 | 413 | Angina pectoris                                                    |
| 1 | 414 | Other forms of chronic ischemic heart disease                      |
| 1 | 415 | Acute pulmonary heart disease                                      |
| 1 | 416 | Chronic pulmonary heart disease                                    |
| 1 | 424 | Other diseases of endocardium                                      |
| 1 | 425 | Cardiomyopathy                                                     |
| 1 | 426 | Conduction disorders                                               |
| 1 | 427 | Cardiac dysrhythmias                                               |
| 1 | 428 | Heart failure                                                      |
| 1 | 433 | Occlusion and stenosis of precerebral arteries                     |
| 1 | 434 | Occlusion of cerebral arteries                                     |
| 1 | 435 | Transient cerebral ischemia                                        |
| 1 | 437 | Other and ill-defined cerebrovascular disease                      |
| 1 | 438 | Late effects of cerebrovascular disease                            |
| 1 | 440 | Atherosclerosis                                                    |
| 1 | 441 | Aortic aneurysm and dissection                                     |
| 1 | 443 | Other peripheral vascular disease                                  |
| 1 | 453 | Other venous embolism and thrombosis                               |

|    |     |                                                                                      |
|----|-----|--------------------------------------------------------------------------------------|
| 1  | 455 | Hemorrhoids                                                                          |
| 1  | 458 | Hypotension                                                                          |
| 1  | 459 | Other disorders of circulatory system                                                |
| 1  | 162 | Malignant neoplasm of trachea                                                        |
| 1  | 995 | Certain adverse effects not elsewhere classified                                     |
| 1  | 996 | Complications peculiar to certain specified procedures                               |
| 1  | 997 | Complications affecting specified body systems                                       |
| 1  | 998 | Other complications of procedures                                                    |
| 1  | 492 | Emphysema                                                                            |
| 1  | 493 | Asthma                                                                               |
| 1  | 496 | Chronic airway obstruction                                                           |
| 1  | 507 | Pneumonitis due to solids and liquids                                                |
| 1  | 511 | Pleurisy                                                                             |
| 2  | 531 | Gastric ulcer                                                                        |
| 3  | 535 | Gastritis and duodenitis                                                             |
| 4  | 552 | Other hernia of abdominal cavity                                                     |
| 5  | 555 | Regional enteritis                                                                   |
| 6  | 558 | Other and unspecified noninfectious gastroenteritis and colitis                      |
| 7  | 53  | Herpes zoster                                                                        |
| 8  | 54  | Herpes simplex                                                                       |
| 8  | 647 | Infectious and parasitic conditions in the mother classifiable elsewhere             |
| 9  | 567 | Peritonitis and retroperitoneal infections                                           |
| 10 | 570 | Acute and subacute necrosis of liver                                                 |
| 11 | 583 | Nephritis and nephropathy                                                            |
| 12 | 590 | Infections of kidney                                                                 |
| 13 | 924 | Contusion of lower limb and of other and unspecified sites                           |
| 14 | 614 | Inflammatory disease of ovary                                                        |
| 14 | 617 | Endometriosis                                                                        |
| 14 | 620 | Noninflammatory disorders of ovary                                                   |
| 14 | 626 | Disorders of menstruation and other abnormal bleeding from female genital tract      |
| 14 | 218 | Uterine leiomyoma                                                                    |
| 15 | 616 | Inflammatory disease of cervix                                                       |
| 16 | 618 | Genital prolapse                                                                     |
| 16 | 625 | Pain and other symptoms associated with female genital organs                        |
| 17 | 641 | Antepartum hemorrhage                                                                |
| 18 | 642 | Hypertension complicating pregnancy                                                  |
| 18 | 644 | Early or threatened labor                                                            |
| 18 | 645 | Late pregnancy                                                                       |
| 18 | 648 | Other current conditions in the mother classifiable elsewhere                        |
| 18 | 652 | Malposition and malpresentation of fetus                                             |
| 18 | 654 | Abnormality of organs and soft tissues of pelvis                                     |
| 18 | 656 | Other known or suspected fetal and placental problems affecting management of mother |
| 18 | 658 | Other problems associated with amniotic cavity and membranes                         |
| 18 | 659 | Other indications for care or intervention related to labor and delivery             |
| 18 | 660 | Obstructed labor                                                                     |
| 18 | 661 | Abnormality of forces of labor                                                       |
| 18 | 663 | Umbilical cord complications                                                         |
| 18 | 664 | Trauma to perineum and vulva during delivery                                         |
| 18 | 669 | Other complications of labor and delivery                                            |
| 19 | 646 | Other complications of pregnancy                                                     |
| 20 | 665 | Other obstetrical trauma                                                             |
| 21 | 666 | Postpartum hemorrhage                                                                |

|    |     |                                                                    |
|----|-----|--------------------------------------------------------------------|
| 22 | 710 | Diffuse diseases of connective tissue                              |
| 23 | 696 | Psoriasis and similar disorders                                    |
| 24 | 199 | Malignant neoplasm without specification of site                   |
| 25 | 726 | Peripheral enthesopathies and allied syndromes                     |
| 26 | 727 | Other disorders of synovium                                        |
| 27 | 805 | Fracture of vertebral column without mention of spinal cord injury |
| 28 | 737 | Curvature of spine                                                 |
| 29 | 860 | Traumatic pneumothorax and hemothorax                              |
| 30 | 242 | Thyrotoxicosis with or without goiter                              |
| 31 | 812 | Fracture of humerus                                                |
| 32 | 291 | Alcohol-induced mental disorders                                   |
| 32 | 296 | Episodic mood disorders                                            |
| 32 | 303 | Alcohol dependence syndrome                                        |
| 33 | 807 | Fracture of ribs                                                   |
| 34 | 824 | Fracture of ankle                                                  |
| 35 | 340 | Multiple sclerosis                                                 |
| 36 | 342 | Hemiplegia and hemiparesis                                         |
| 37 | 355 | Mononeuritis of lower limb                                         |
| 38 | 368 | Visual disturbances                                                |
| 39 | 386 | Vertiginous syndromes and other disorders of vestibular system     |
| 40 | 920 | Contusion of face                                                  |
| 41 | 423 | Other diseases of pericardium                                      |
| 42 | 429 | Ill-defined descriptions and complications of heart disease        |
| 43 | 431 | Intracerebral hemorrhage                                           |
| 44 | 969 | Poisoning by psychotropic agents                                   |
| 45 | 473 | Chronic sinusitis                                                  |
| 46 | 477 | Allergic rhinitis                                                  |
| 47 | 478 | Other diseases of upper respiratory tract                          |
| 48 | 482 | Other bacterial pneumonia                                          |

**Table 7.** High Income Community Detection - Walktrap

| <b>Cluster Number</b> | <b>ICD Code</b> | <b>Diagnosis Name</b>                                              |
|-----------------------|-----------------|--------------------------------------------------------------------|
| 0                     | 515             | Postinflammatory pulmonary fibrosis                                |
| 0                     | 600             | Hyperplasia of prostate                                            |
| 0                     | 788             | Symptoms involving urinary system                                  |
| 0                     | 198             | Secondary malignant neoplasm of other specified sites              |
| 0                     | 714             | Rheumatoid arthritis and other inflammatory polyarthropathies      |
| 0                     | 721             | Spondylosis and allied disorders                                   |
| 0                     | 722             | Intervertebral disc disorders                                      |
| 0                     | 733             | Other disorders of bone and cartilage                              |
| 0                     | 250             | Diabetes mellitus                                                  |
| 0                     | 781             | Symptoms involving nervous and musculoskeletal systems             |
| 0                     | 998             | Other complications of procedures                                  |
| 0                     | 294             | Persistent mental disorders due to conditions classified elsewhere |
| 0                     | 305             | Nondependent abuse of drugs                                        |
| 0                     | 415             | Acute pulmonary heart disease                                      |
| 0                     | 426             | Conduction disorders                                               |
| 0                     | 433             | Occlusion and stenosis of precerebral arteries                     |
| 0                     | 997             | Complications affecting specified body systems                     |
| 1                     | 518             | Other diseases of lung                                             |

|   |     |                                                                                |
|---|-----|--------------------------------------------------------------------------------|
| 1 | 530 | Diseases of esophagus                                                          |
| 1 | 531 | Gastric ulcer                                                                  |
| 1 | 536 | Disorders of function of stomach                                               |
| 1 | 38  | Septicemia                                                                     |
| 1 | 41  | Bacterial infection in conditions classified elsewhere and of unspecified site |
| 1 | 560 | Intestinal obstruction without mention of hernia                               |
| 1 | 562 | Diverticula of intestine                                                       |
| 1 | 564 | Functional digestive disorders                                                 |
| 1 | 578 | Gastrointestinal hemorrhage                                                    |
| 1 | 583 | Nephritis and nephropathy                                                      |
| 1 | 584 | Acute kidney failure                                                           |
| 1 | 585 | Chronic kidney disease CKD                                                     |
| 1 | 588 | Disorders resulting from impaired renal function                               |
| 1 | 590 | Infections of kidney                                                           |
| 1 | 593 | Other disorders of kidney and ureter                                           |
| 1 | 599 | Other disorders of urethra and urinary tract                                   |
| 1 | 784 | Symptoms involving head and neck                                               |
| 1 | 274 | Gout                                                                           |
| 1 | 112 | Candidiasis                                                                    |
| 1 | 787 | Symptoms involving digestive system                                            |
| 1 | 790 | Nonspecific findings on examination of blood                                   |
| 1 | 162 | Malignant neoplasm of trachea                                                  |
| 1 | 682 | Other cellulitis and abscess                                                   |
| 1 | 707 | Chronic ulcer of skin                                                          |
| 1 | 715 | Osteoarthritis and allied disorders                                            |
| 1 | 716 | Other and unspecified arthropathies                                            |
| 1 | 728 | Disorders of muscle                                                            |
| 1 | 553 | Other hernia of abdominal cavity without mention of obstruction or gangrene    |
| 1 | 263 | Other and unspecified protein-calorie malnutrition                             |
| 1 | 780 | General symptoms                                                               |
| 1 | 782 | Symptoms involving skin and other integumentary tissue                         |
| 1 | 783 | Symptoms concerning nutrition                                                  |
| 1 | 272 | Disorders of lipid metabolism                                                  |
| 1 | 785 | Symptoms involving cardiovascular system                                       |
| 1 | 786 | Symptoms involving respiratory system and other chest symptoms                 |
| 1 | 275 | Disorders of mineral metabolism                                                |
| 1 | 276 | Disorders of fluid                                                             |
| 1 | 789 | Other symptoms involving abdomen and pelvis                                    |
| 1 | 278 | Overweight                                                                     |
| 1 | 280 | Iron deficiency anemias                                                        |
| 1 | 794 | Nonspecific abnormal results of function studies                               |
| 1 | 285 | Other and unspecified anemias                                                  |
| 1 | 799 | Other ill-defined and unknown causes of morbidity and mortality                |
| 1 | 288 | Diseases of white blood cells                                                  |
| 1 | 290 | Dementias                                                                      |
| 1 | 300 | Anxiety                                                                        |
| 1 | 311 | Depressive disorder                                                            |
| 1 | 327 | Organic sleep disorders                                                        |
| 1 | 331 | Other cerebral degenerations                                                   |
| 1 | 342 | Hemiplegia and hemiparesis                                                     |
| 1 | 345 | Epilepsy and recurrent seizures                                                |
| 1 | 348 | Other conditions of brain                                                      |

|   |     |                                                                 |
|---|-----|-----------------------------------------------------------------|
| 1 | 357 | Inflammatory and toxic neuropathy                               |
| 1 | 362 | Other retinal disorders                                         |
| 1 | 403 | Hypertensive chronic kidney disease                             |
| 1 | 404 | Hypertensive heart and chronic kidney disease                   |
| 1 | 410 | Acute myocardial infarction                                     |
| 1 | 411 | Other acute and subacute forms of ischemic heart disease        |
| 1 | 412 | Old myocardial infarction                                       |
| 1 | 414 | Other forms of chronic ischemic heart disease                   |
| 1 | 416 | Chronic pulmonary heart disease                                 |
| 1 | 425 | Cardiomyopathy                                                  |
| 1 | 428 | Heart failure                                                   |
| 1 | 434 | Occlusion of cerebral arteries                                  |
| 1 | 437 | Other and ill-defined cerebrovascular disease                   |
| 1 | 438 | Late effects of cerebrovascular disease                         |
| 1 | 440 | Atherosclerosis                                                 |
| 1 | 443 | Other peripheral vascular disease                               |
| 1 | 453 | Other venous embolism and thrombosis                            |
| 1 | 458 | Hypotension                                                     |
| 1 | 459 | Other disorders of circulatory system                           |
| 1 | 466 | Acute bronchitis and bronchiolitis                              |
| 1 | 482 | Other bacterial pneumonia                                       |
| 1 | 995 | Certain adverse effects not elsewhere classified                |
| 1 | 996 | Complications peculiar to certain specified procedures          |
| 1 | 486 | Pneumonia                                                       |
| 1 | 491 | Chronic bronchitis                                              |
| 1 | 492 | Emphysema                                                       |
| 1 | 493 | Asthma                                                          |
| 1 | 496 | Chronic airway obstruction                                      |
| 1 | 511 | Pleurisy                                                        |
| 2 | 519 | Other diseases of respiratory system                            |
| 3 | 8   | Intestinal infections due to other organisms                    |
| 4 | 532 | Duodenal ulcer                                                  |
| 5 | 533 | Peptic ulcer                                                    |
| 5 | 273 | Disorders of plasma protein metabolism                          |
| 5 | 281 | Other deficiency anemias                                        |
| 5 | 710 | Diffuse diseases of connective tissue                           |
| 5 | 291 | Alcohol-induced mental disorders                                |
| 5 | 344 | Other paralytic syndromes                                       |
| 5 | 369 | Blindness and low vision                                        |
| 5 | 401 | Essential hypertension                                          |
| 5 | 435 | Transient cerebral ischemia                                     |
| 5 | 473 | Chronic sinusitis                                               |
| 6 | 535 | Gastritis and duodenitis                                        |
| 6 | 455 | Hemorrhoids                                                     |
| 7 | 558 | Other and unspecified noninfectious gastroenteritis and colitis |
| 7 | 719 | Other and unspecified disorders of joint                        |
| 7 | 724 | Other and unspecified disorders of back                         |
| 7 | 729 | Other disorders of soft tissues                                 |
| 7 | 244 | Acquired hypothyroidism                                         |
| 7 | 292 | Drug-induced mental disorders                                   |
| 7 | 295 | Schizophrenic disorders                                         |
| 7 | 296 | Episodic mood disorders                                         |

|    |     |                                                                                          |
|----|-----|------------------------------------------------------------------------------------------|
| 7  | 301 | Personality disorders                                                                    |
| 7  | 304 | Drug dependence                                                                          |
| 7  | 309 | Adjustment reaction                                                                      |
| 7  | 338 | Pain                                                                                     |
| 7  | 402 | Hypertensive heart disease                                                               |
| 7  | 413 | Angina pectoris                                                                          |
| 7  | 427 | Cardiac dysrhythmias                                                                     |
| 7  | 429 | Ill-defined descriptions and complications of heart disease                              |
| 8  | 569 | Other disorders of intestine                                                             |
| 9  | 571 | Chronic liver disease and cirrhosis                                                      |
| 9  | 572 | Liver abscess and sequelae of chronic liver disease                                      |
| 9  | 574 | Cholelithiasis                                                                           |
| 9  | 577 | Diseases of pancreas                                                                     |
| 9  | 70  | Viral hepatitis                                                                          |
| 9  | 287 | Purpura and other hemorrhagic conditions                                                 |
| 9  | 284 | Aplastic anemia and other bone marrow failure syndromes                                  |
| 9  | 286 | Coagulation defects                                                                      |
| 9  | 303 | Alcohol dependence syndrome                                                              |
| 10 | 573 | Other disorders of liver                                                                 |
| 11 | 575 | Other disorders of gallbladder                                                           |
| 12 | 592 | Calculus of kidney and ureter                                                            |
| 13 | 596 | Other disorders of bladder                                                               |
| 14 | 614 | Inflammatory disease of ovary                                                            |
| 15 | 620 | Noninflammatory disorders of ovary                                                       |
| 16 | 110 | Dermatophytosis                                                                          |
| 17 | 625 | Pain and other symptoms associated with female genital organs                            |
| 18 | 626 | Disorders of menstruation and other abnormal bleeding from female genital tract          |
| 19 | 642 | Hypertension complicating pregnancy                                                      |
| 20 | 646 | Other complications of pregnancy                                                         |
| 21 | 647 | Infectious and parasitic conditions in the mother classifiable elsewhere                 |
| 22 | 648 | Other current conditions in the mother classifiable elsewhere                            |
| 23 | 649 | Other conditions or status of the mother complicating pregnancy                          |
| 24 | 654 | Abnormality of organs and soft tissues of pelvis                                         |
| 25 | 659 | Other indications for care or intervention related to labor and delivery                 |
| 26 | 153 | Malignant neoplasm of colon                                                              |
| 27 | 681 | Cellulitis and abscess of finger and toe                                                 |
| 28 | 197 | Secondary malignant neoplasm of respiratory and digestive systems                        |
| 29 | 199 | Malignant neoplasm without specification of site                                         |
| 30 | 211 | Benign neoplasm of other parts of digestive system                                       |
| 31 | 730 | Osteomyelitis                                                                            |
| 32 | 731 | Osteitis deformans and osteopathies associated with other disorders classified elsewhere |
| 33 | 242 | Thyrotoxicosis with or without goiter                                                    |
| 34 | 723 | Other disorders of cervical region                                                       |
| 35 | 251 | Other disorders of pancreatic internal secretion                                         |
| 36 | 266 | Deficiency of B-complex components                                                       |
| 37 | 293 | Transient mental disorders due to conditions classified elsewhere                        |
| 38 | 298 | Other nonorganic psychoses                                                               |
| 39 | 820 | Fracture of neck of femur                                                                |
| 40 | 332 | "Parkinsons disease                                                                      |
| 41 | 333 | Other extrapyramidal disease and abnormal movement disorders                             |
| 42 | 337 | Disorders of the autonomic nervous system                                                |
| 43 | 346 | Migraine                                                                                 |

|    |     |                                                                     |
|----|-----|---------------------------------------------------------------------|
| 44 | 355 | Mononeuritis of lower limb                                          |
| 45 | 356 | Hereditary and idiopathic peripheral neuropathy                     |
| 46 | 365 | Glaucoma                                                            |
| 47 | 389 | Hearing loss                                                        |
| 48 | 397 | Diseases of other endocardial structures                            |
| 49 | 218 | Uterine leiomyoma                                                   |
| 50 | 424 | Other diseases of endocardium                                       |
| 51 | 441 | Aortic aneurysm and dissection                                      |
| 52 | 444 | Arterial embolism and thrombosis                                    |
| 53 | 447 | Other disorders of arteries and arterioles                          |
| 54 | 456 | Varicose veins of other sites                                       |
| 55 | 969 | Poisoning by psychotropic agents                                    |
| 56 | 465 | Acute upper respiratory infections of multiple or unspecified sites |
| 57 | 477 | Allergic rhinitis                                                   |
| 58 | 490 | Bronchitis                                                          |
| 59 | 507 | Pneumonitis due to solids and liquids                               |

**Table 8.** Low Income Community Detection - Walktrap

Vt=0.4

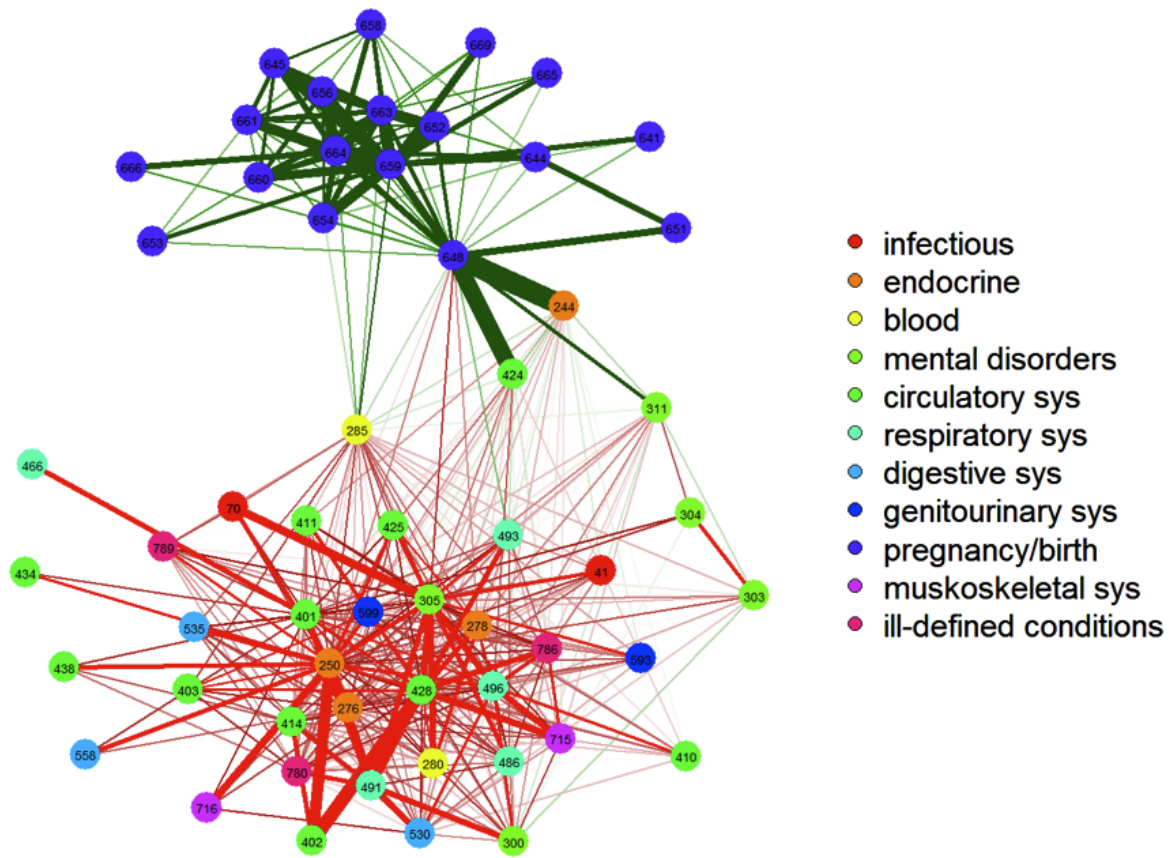

Figure 2. Network representation of over-represented Private Insurance diagnoses compared to Medicaid
